# Supplementary figures and images for: Preparation of surface molecularly imprinted polymers as the solid-phase extraction sorbents for the specific recognition of penicilloic acid in penicillin
Source: Royal Society of Chemistry journal article supplement (doi:10.1039/c4ay01515k), 2014-01-01

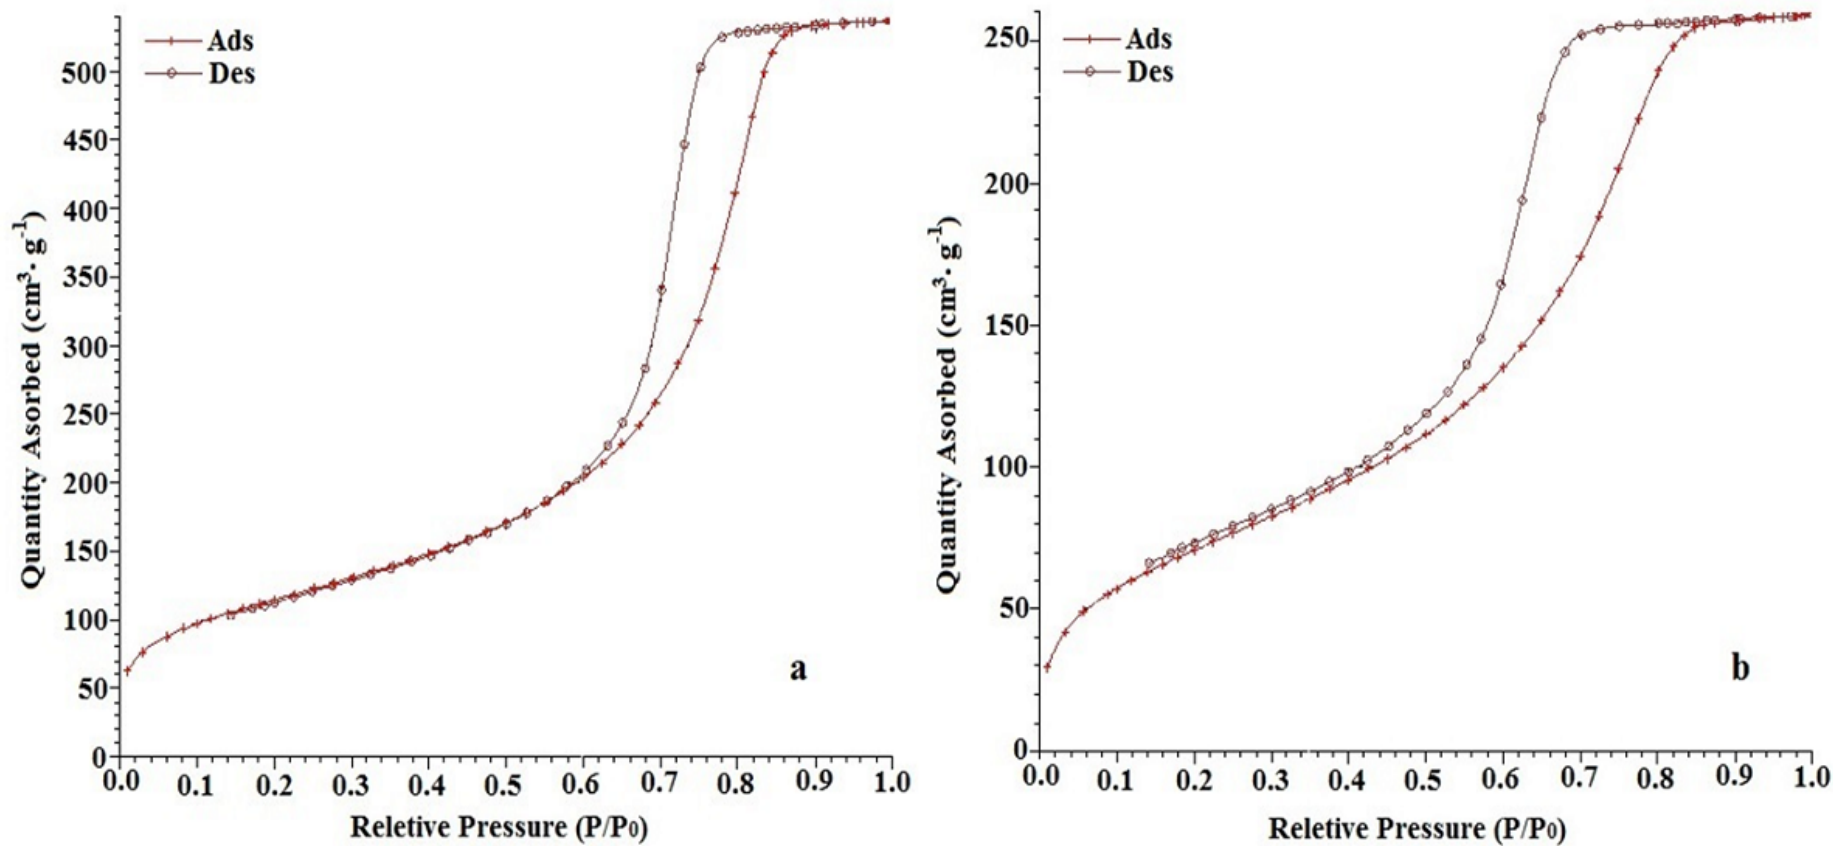

**Figure 1**  $N_2$  adsorption and desorption isotherms of activated silica gels (a) and SMIPs (b)

Supplement: c4ay01515k1.pdf [file c4ay01515k1.pdf]
